# Supplementary material
Source: PubMed Central journal article supplement (PMC5783733)
Supplement: NIHMS926083-supplement.pdf [file NIHMS926083-supplement.pdf]

Appendix  
"Doubling Up" on Produce at Detroit Farmers Markets: Patterns and Correlates of Use of a Healthy Food Incentive  
Cohen et al.

Appendix Figure 1. Detroit farmers markets, 2013.

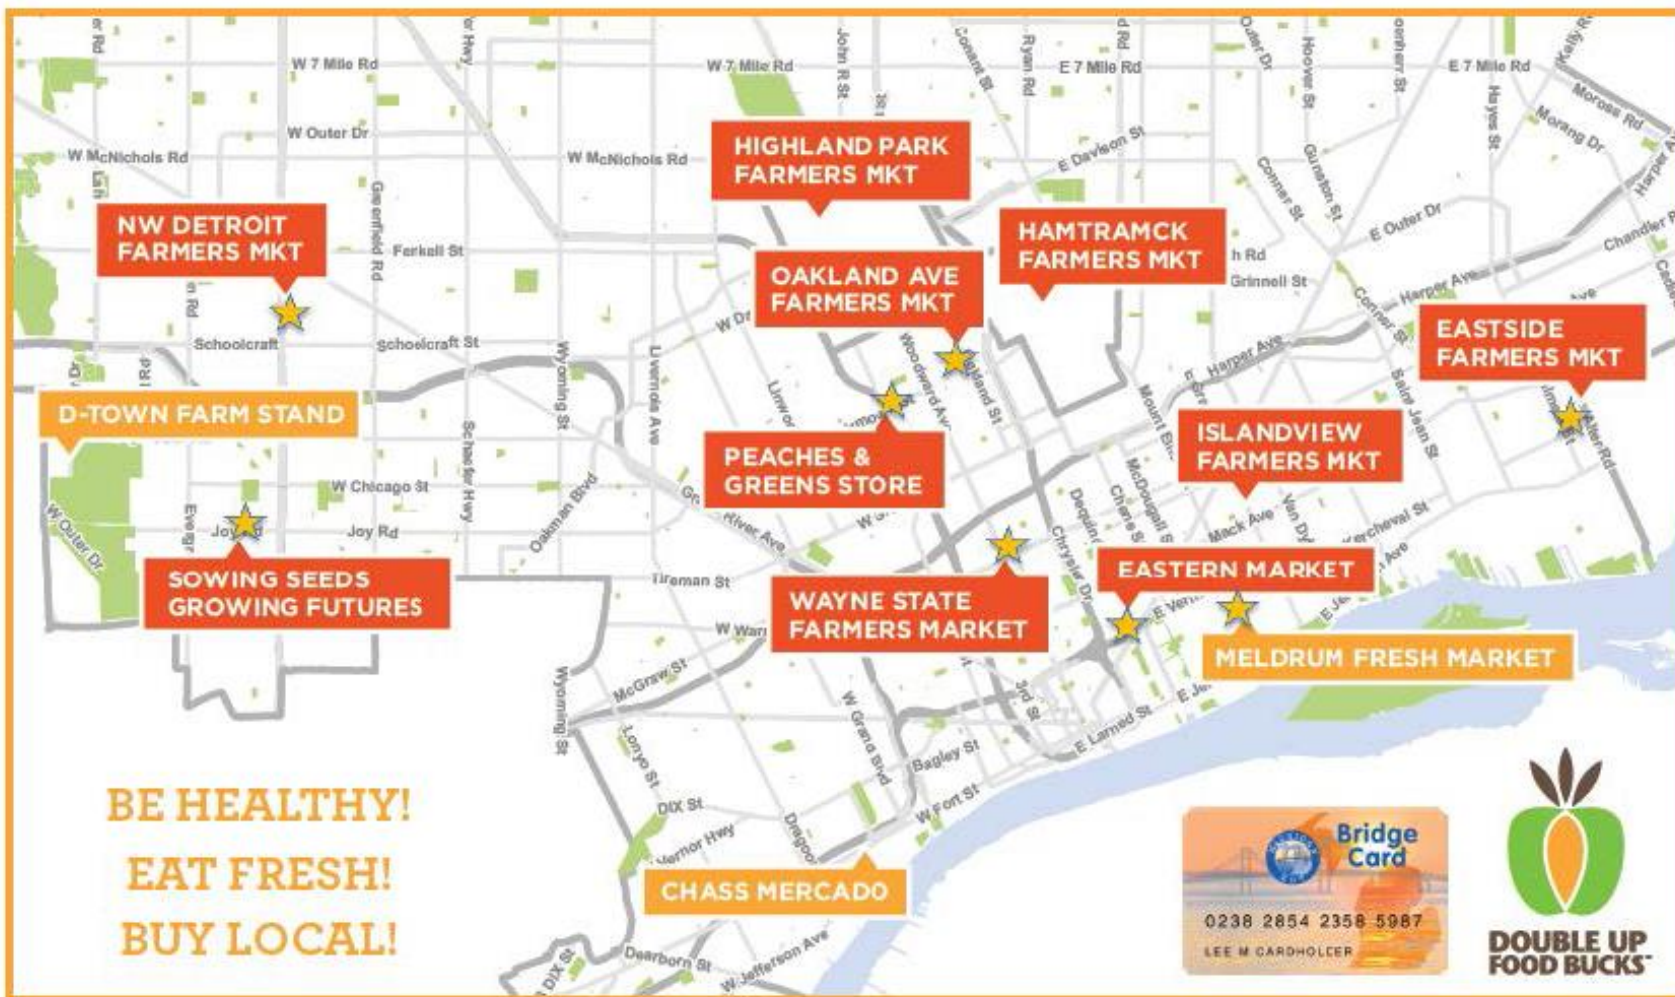

Adapted from Detroit Community Markets

★ = markets accepting DUFb in 2013
